# Supplementary figures and images for: Quantitative investigation of negative membrane curvature sensing and generation by I-BARs in filopodia of living cells
Source: Royal Society of Chemistry journal article supplement (doi:10.1039/c9sm01185d), 2019-01-01

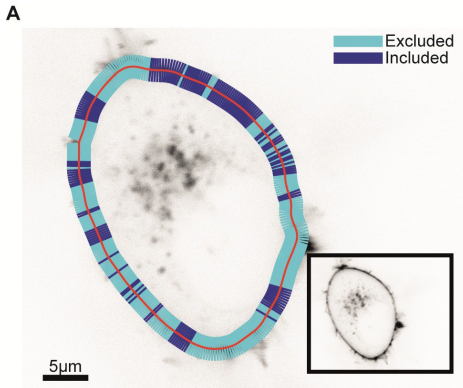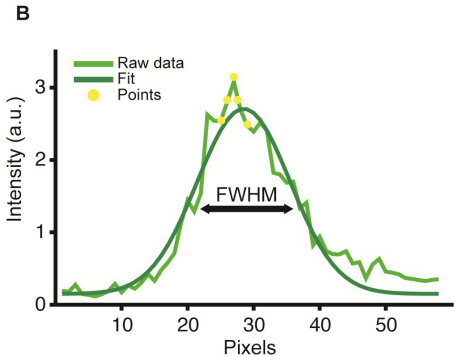

Supplement: c9sm01185d4.pdf [file c9sm01185d4.pdf]

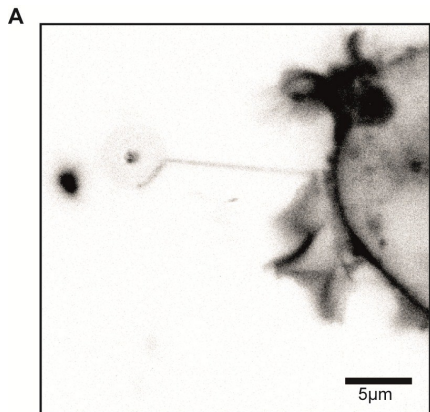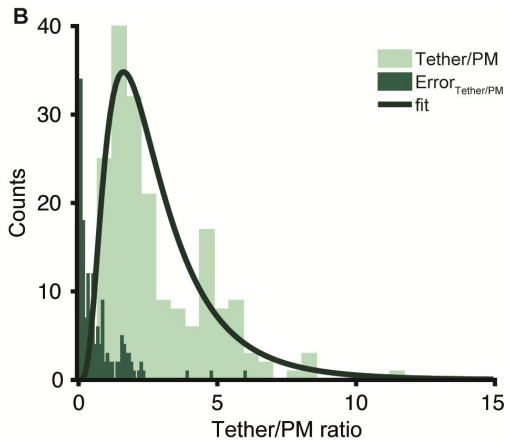

Supplement: c9sm01185d5.pdf [file c9sm01185d5.pdf]

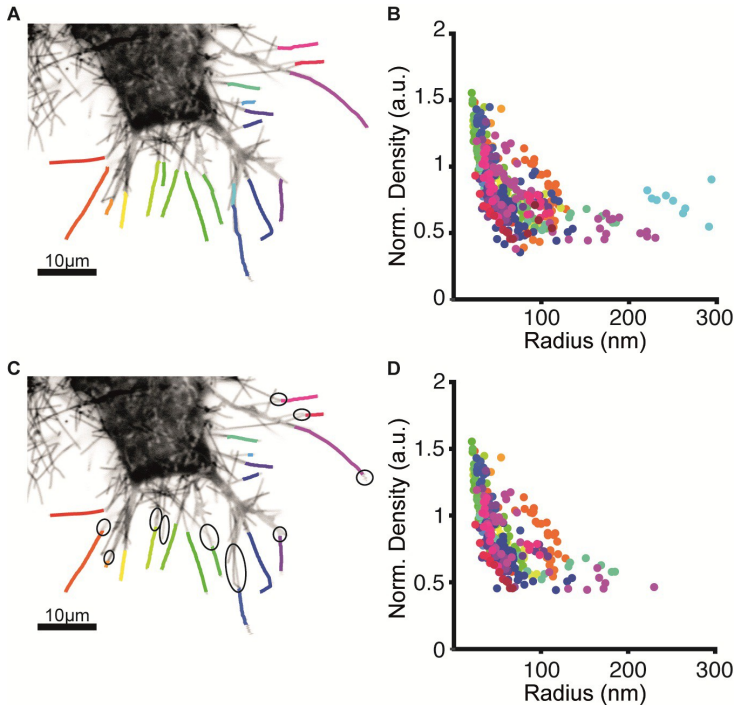

Supplement: c9sm01185d6.pdf [file c9sm01185d6.pdf]
